# Supplementary material for: Substituent effects on the intermolecular interactions and emission behaviors in pyrene-based mechanochromic luminogens
Source: Royal Society of Chemistry journal article supplement (doi:10.1039/d2tc01684b), 2022-01-01
Supplement: d2tc01684b1.pdf [file d2tc01684b1.pdf]

# Substituent Effect on the Intermolecular Interactions and Emission Behaviors in Pyrene-Based Mechanochromic Luminogens

Ze-Dong Yu,<sup>a</sup> Xiao-Xu Dong,<sup>a</sup> Jing-Yi Cao,<sup>a</sup> Wen-Xuan Zhao,<sup>a</sup> Ge-Hua Bi,<sup>a</sup> Chuan-Zeng Wang,<sup>\*a, b</sup>  
Tian Zhang,<sup>\*a, c</sup> Shofiur Rahman,<sup>d</sup> Paris E. Georghiou,<sup>d</sup> Jian-Bin Lin<sup>e</sup> and Takehiko Yamato<sup>\*b</sup>

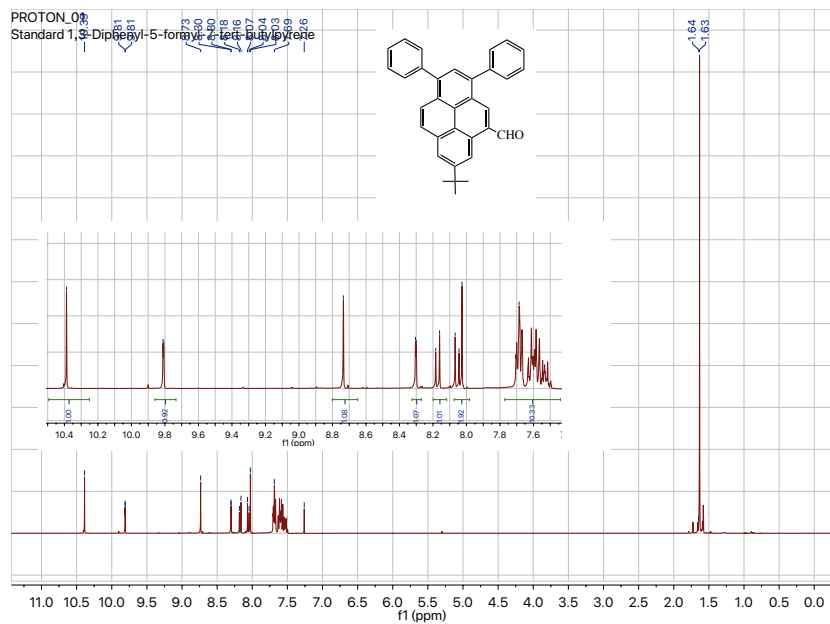

Figure S1  $^1\text{H-NMR}$  spectrum of **2** (400 MHz, 293 K,  $\text{CDCl}_3$ ).

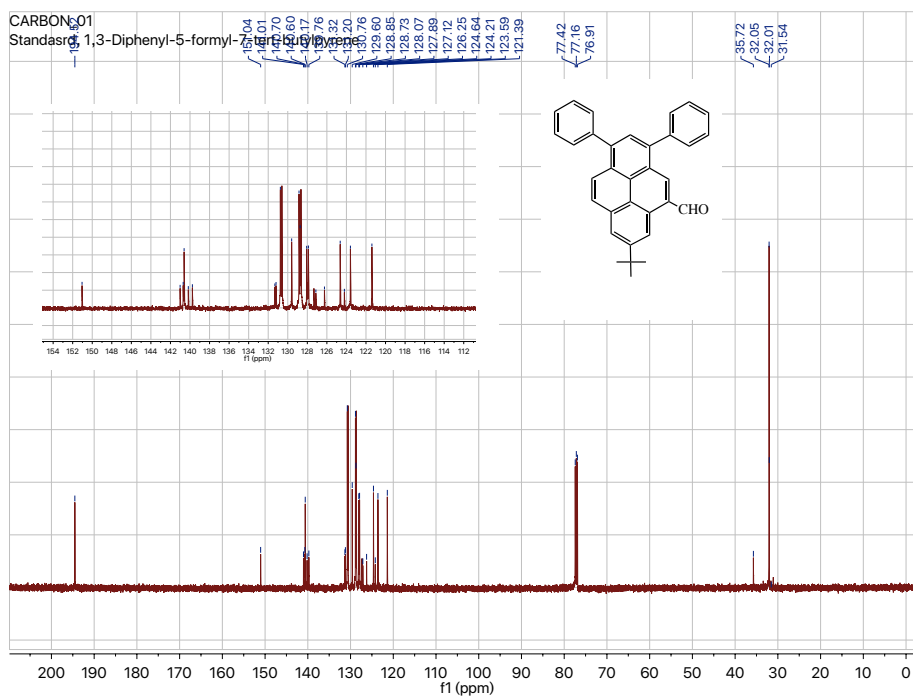

Figure S2  $^{13}\text{C-NMR}$  spectrum of **2** (100 MHz, 293 K,  $\text{CDCl}_3$ ).



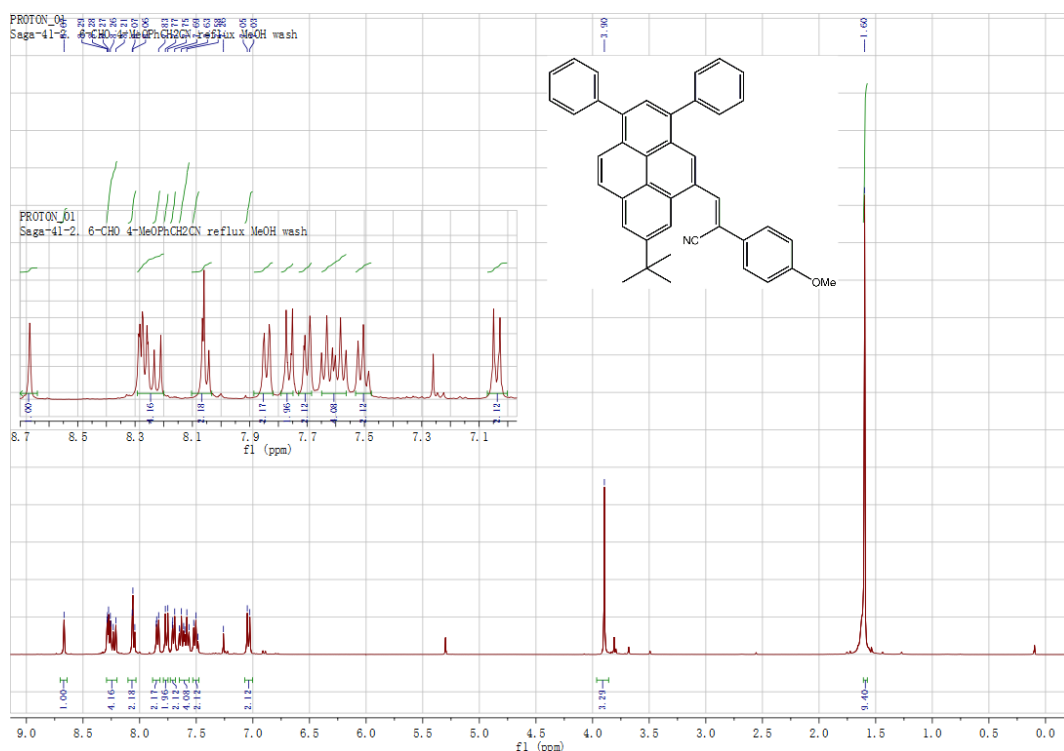

Figure S5  $^1\text{H-NMR}$  spectrum of **3b** (400 MHz, 293 K,  $\text{CDCl}_3$ ).

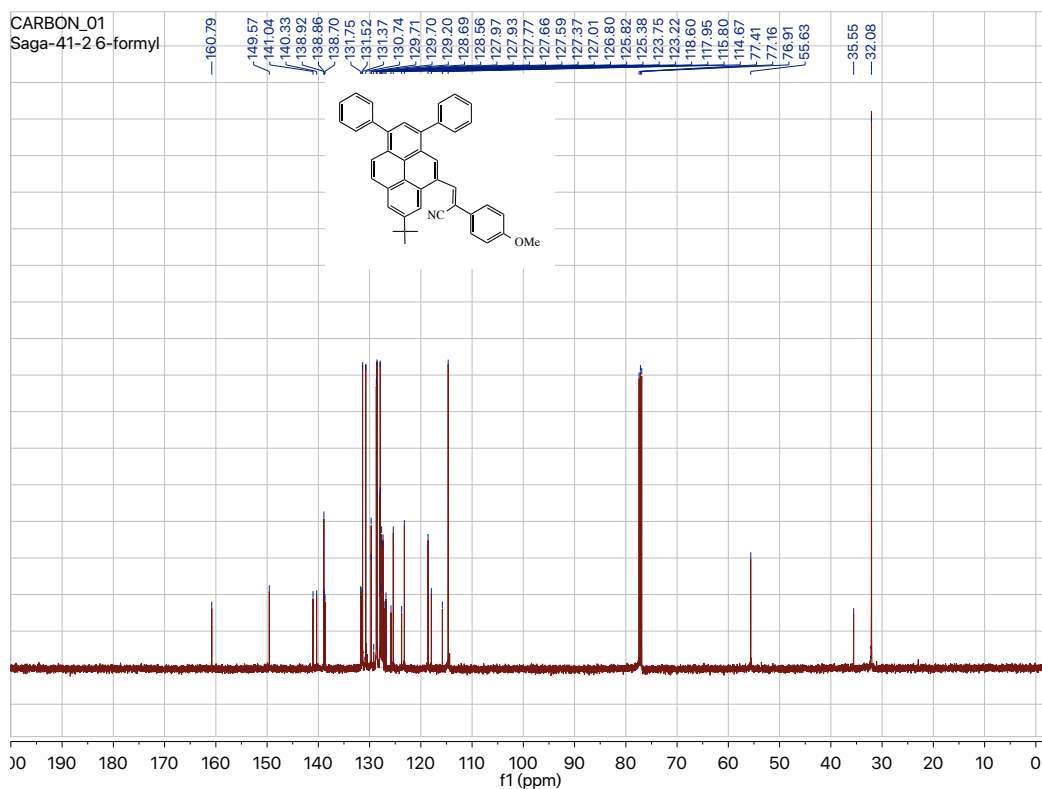

Figure S6  $^{13}\text{C-NMR}$  spectrum of **3b** (100 MHz, 293 K,  $\text{CDCl}_3$ ).

**Table S1** Crystal data and structure refinement of **3a** and **3b**. <sup>[a, b]</sup>

| Compounds                                            | <b>3a</b>                          | <b>3b</b>                          |
|------------------------------------------------------|------------------------------------|------------------------------------|
| Empirical formula                                    | C <sub>41</sub> H <sub>31</sub> N  | C <sub>42</sub> H <sub>33</sub> NO |
| Formula weight                                       | 537.67                             | 567.69                             |
| Crystal system                                       | Monoclinic                         | Monoclinic                         |
| Space group                                          | <i>P</i> 2 <sub>1</sub> / <i>n</i> | <i>P</i> 2 <sub>1</sub> / <i>c</i> |
| <i>a</i> [Å]                                         | 14.3989(2)                         | 14.07592(14)                       |
| <i>b</i> [Å]                                         | 11.5155(2)                         | 21.5569(3)                         |
| <i>c</i> [Å]                                         | 17.4968(2)                         | 9.90225(9)                         |
| $\alpha$ [°]                                         | 90.00                              | 90.00                              |
| $\beta$ [°]                                          | 101.1600(10)                       | 94.3574(9)                         |
| $\gamma$ [°]                                         | 90.00                              | 90.00                              |
| Volume[Å <sup>3</sup> ]                              | 2846.29(7)                         | 2995.99(6)                         |
| <i>Z</i>                                             | 4                                  | 4                                  |
| $\mu$                                                | 0.545 mm <sup>-1</sup>             | 0.571 mm <sup>-1</sup>             |
| <i>F</i> (000)                                       | 1136                               | 1200                               |
| Crystal size[mm <sup>3</sup> ]                       | 0.145 × 0.069 × 0.049              | 0.247 × 0.068 × 0.067              |
| Dcalcd[Mg/m <sup>3</sup> ]                           | 1.255                              | 1.259                              |
| Temperature [K]                                      | 100(2)                             | 100(2)                             |
| Measured reflns                                      | 36310                              | 38174                              |
| Unique reflns                                        | 6275                               | 6275                               |
| Observed reflns                                      | 5968                               | 5339                               |
| Parameters                                           | 382                                | 402                                |
| <i>R</i> (int)                                       | 0.0498                             | 0.0571                             |
| <i>R</i> [ <i>I</i> > 2σ( <i>I</i> )] <sup>[a]</sup> | 0.0421                             | 0.0436                             |
| <i>wR</i> 2[all data] <sup>[b]</sup>                 | 0.1054                             | 0.11228                            |
| GOF on <i>F</i> <sup>2</sup>                         | 1.029                              | 1.056                              |

<sup>[a]</sup> $R_1 = \sum ||F_o| - |F_c||$  (based on reflections with  $F_o^2 > 2\sigma F^2$ ) <sup>[b]</sup> $wR_2 = [\sum [w(F_o^2 - F_c^2)^2] / \sum [w(F_o^2)^2]]^{1/2}$ ;  $w = 1/[\sigma^2(F_o^2) + (0.095P)^2]$ ;  $P = [\max(F_o^2, 0) + 2F_c^2]/3$  (also with  $F_o^2 > 2\sigma F^2$ )

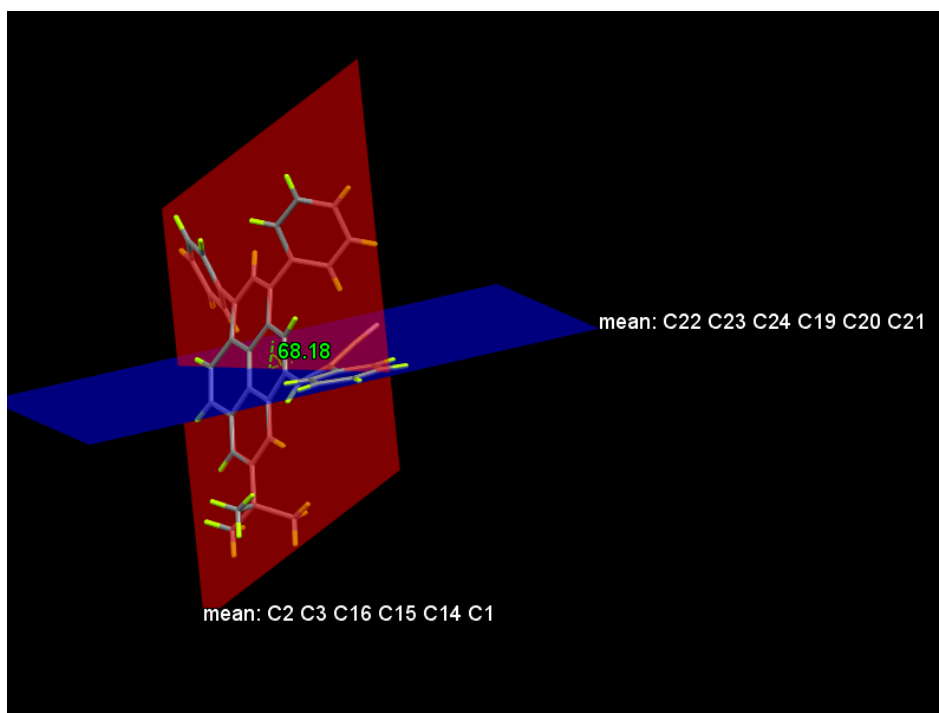

**Figure S7** The dihedral angle between the pyrene core and the C<sub>6</sub> aromatic moiety of compound **3a**.

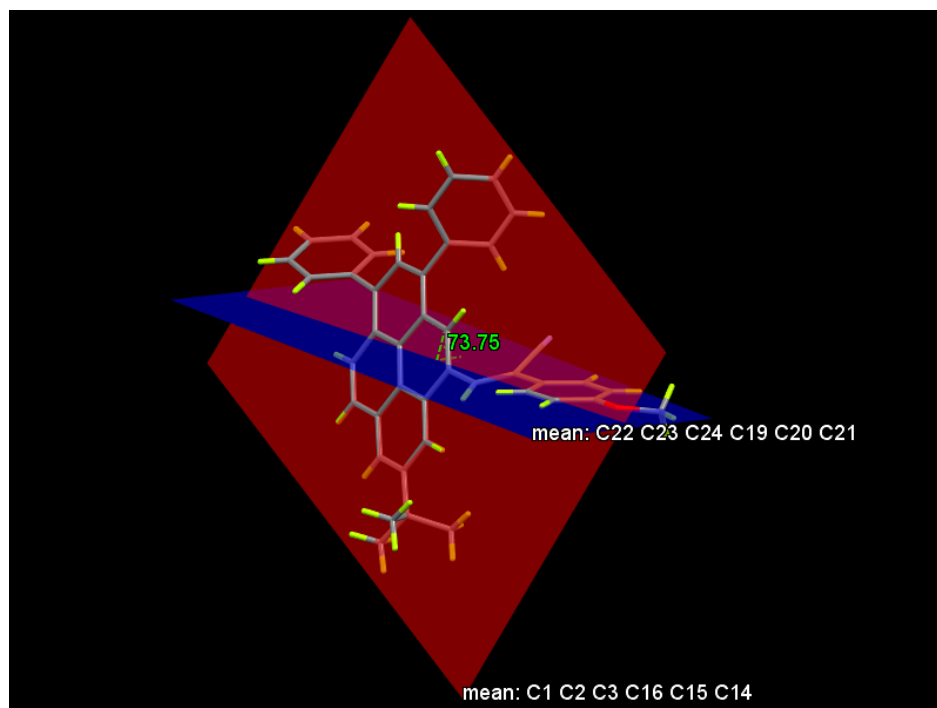

**Figure S8** The dihedral angle between the pyrene core and the C<sub>6</sub> aromatic moiety with methoxy group of compound **3b**.

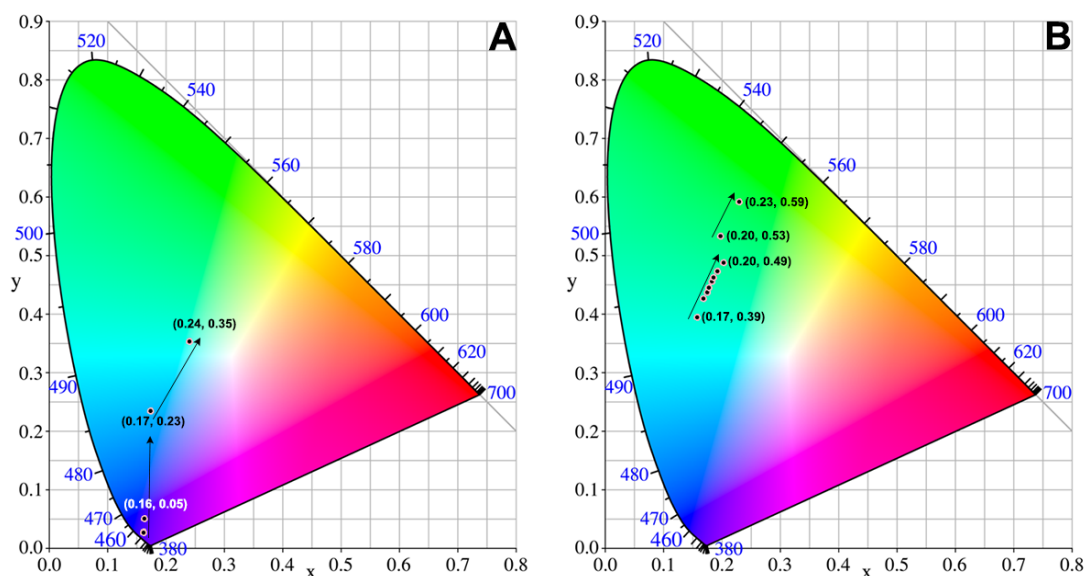

**Figure S9** CIE 1931 chromaticity diagram and the color coordinates for **3a** (A), and **3b** (B) in mixture solution of H<sub>2</sub>O/THF.

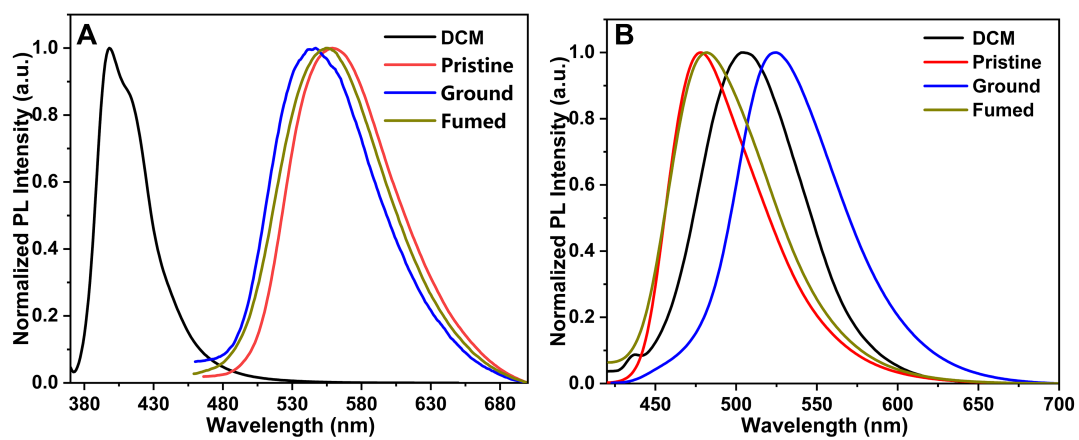

**Figure S10** The emission spectra of **3a** (A) **3b** (B) in different states.

**Table S2** Selected dihedral angles (in deg.) for **3b** in the pristine and ground states.  $S_0/S_1$  and  $\Delta$  represent the geometric parameters extracted from the optimized  $S_0/S_1$  states and the modifications between two states, respectively.

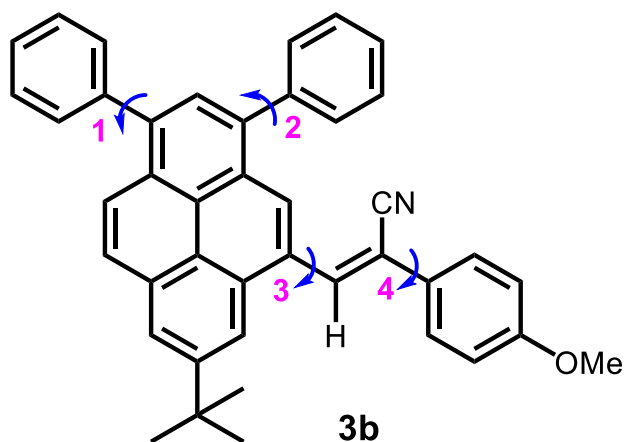

| Locations | Pristine |        |          | Ground |        |          |
|-----------|----------|--------|----------|--------|--------|----------|
|           | $S_0$    | $S_1$  | $\Delta$ | $S_0$  | $S_1$  | $\Delta$ |
| <b>1</b>  | -54.34   | -52.25 | 2.09     | -52.03 | -46.71 | 5.32     |
| <b>2</b>  | -56.16   | -52.51 | 3.65     | -48.49 | -42.14 | 6.35     |
| <b>3</b>  | 47.35    | 39.23  | 8.12     | 39.98  | 23.90  | 16.08    |
| <b>4</b>  | 20.70    | 22.93  | 2.23     | 26.44  | 19.77  | 6.67     |

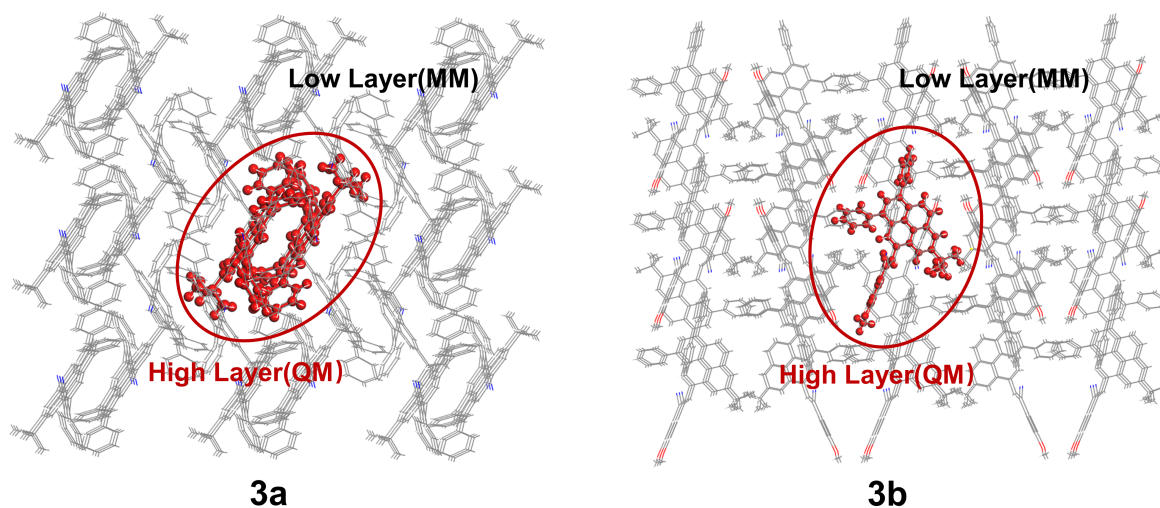

**Figure S11** Setup of the ONIOM models for **3a-b**.



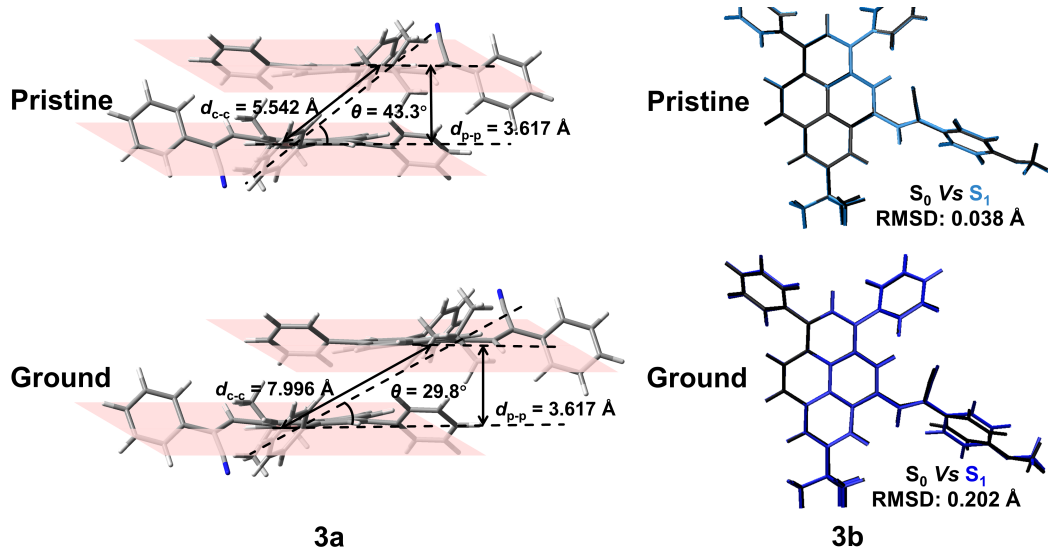

**Figure S12** The molecular packing motif for the pristine and ground for **3a-b**.
